# Supplementary material
Source: PubMed Central journal article supplement (PMC7271364)

## Supplementary Data

### **Impact of Zero-valent Iron Nanoparticles on *Fremyella diplosiphon* Transesterified Lipids and Fatty Acid Methyl Esters**

Somayeh Gharaie Fathabad<sup>1</sup>, Behnam Tabatabai<sup>1</sup>, Dy'mon Walker<sup>1</sup>, Huan Chen<sup>2</sup>, Jie Lu<sup>2,3</sup>,  
Kadir Aslan<sup>4</sup>, Jamal Uddin<sup>5</sup>, William Ghann<sup>6</sup>, and Viji Sittther<sup>1\*</sup>

<sup>1</sup>Department of Biology, Morgan State University, 1700 East Cold Spring Lane, Baltimore,  
Maryland 21251, United States

<sup>2</sup>National High Magnetic Field Laboratory and <sup>3</sup>Future Fuels Institute, Florida State University,  
1800 East Paul Dirac Drive, Tallahassee, Florida 32310, United States

<sup>4</sup>Department of Chemical Engineering, Morgan State University, 1700 East Cold Spring Lane,  
Baltimore, Maryland 21251, United States

<sup>5,6</sup>Center for Nanotechnology, Department of Natural Sciences, Coppin State University, 2500  
West North Avenue, Baltimore, Maryland 21216.

## Supplementary Data List

**Figure S1.** *Fremyella diplosiphon* strains (a) SF33 and (b) B481 grown in BG11/HEPES medium with 0.05, 0.1, 0.2, 0.4, 0.8, 1.6 and, 3.2 mg L<sup>-1</sup> Nanofer 25 over a period 15 days.

**Figure S2.** Impact of 0.2, 0.4, 0.8, and 1.6 mg L<sup>-1</sup> Nanofer 25s on (a) chlorophyll *a* (chl*a*) and (b) carotenoid accumulation in *Fremyella diplosiphon* strains, SF33 and B481.

**Figure S3.** Impact of 0.2, 0.4, 0.8, and 1.6 mg L<sup>-1</sup> Nanofer 25s on (a) phycoerythrin, (b) allophyocyanin, and (c) phycoerythrin accumulation in *Fremyella diplosiphon* strains, SF33 and B481.

**Figure S1.** *Fremyella diplosiphon* strains (a) SF33 and (b) B481 grown in BG11/HEPES medium with 0.05, 0.1, 0.2, 0.4, 0.8, 1.6 and, 3.2 mg L<sup>-1</sup> Nanofer 25 over a period 15 days.

a)

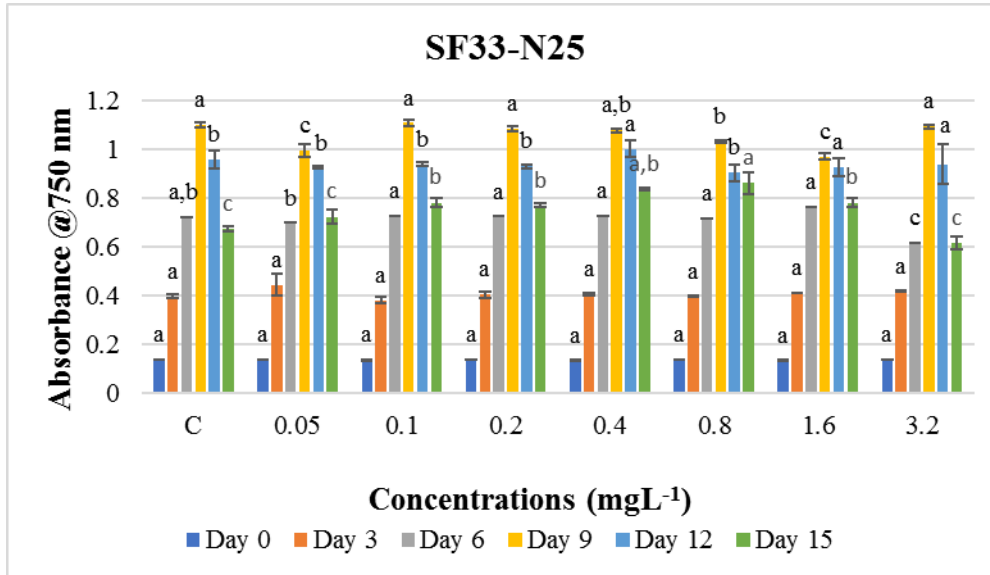

b)

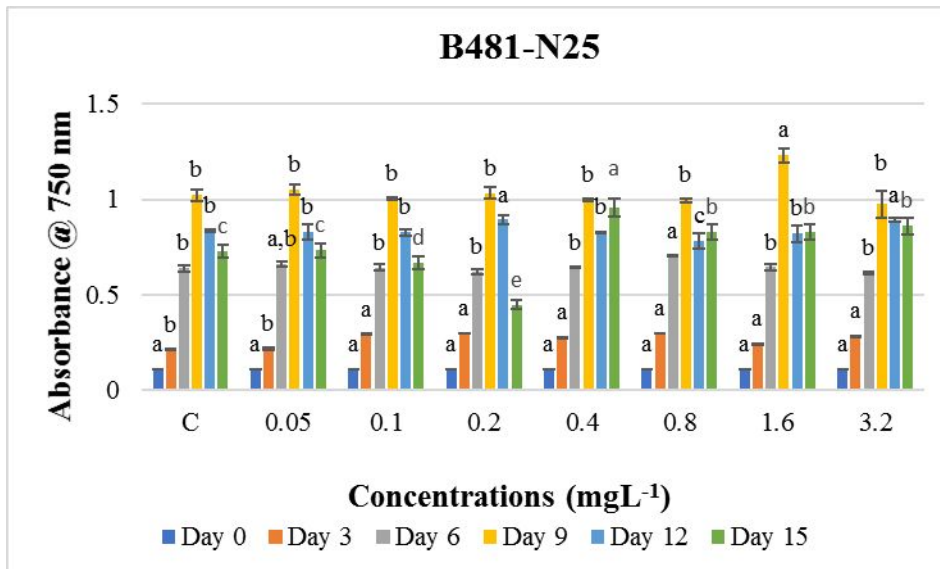

**Figure S2.** Impact of 0.2, 0.4, 0.8, and 1.6 mg L<sup>-1</sup> Nanofer 25s on (a) chlorophyll *a* (chl<sub>a</sub>) and (b) carotenoid accumulation in *Fremyella diplosiphon* strains, SF33 and B481.

a)

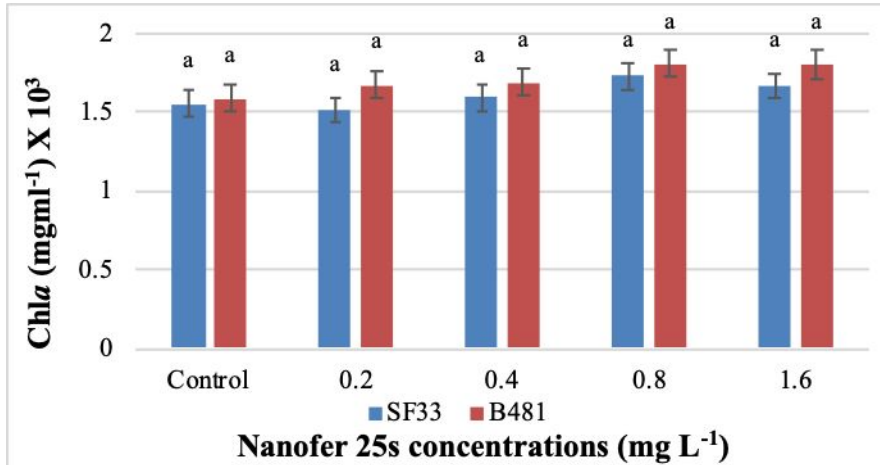

b)

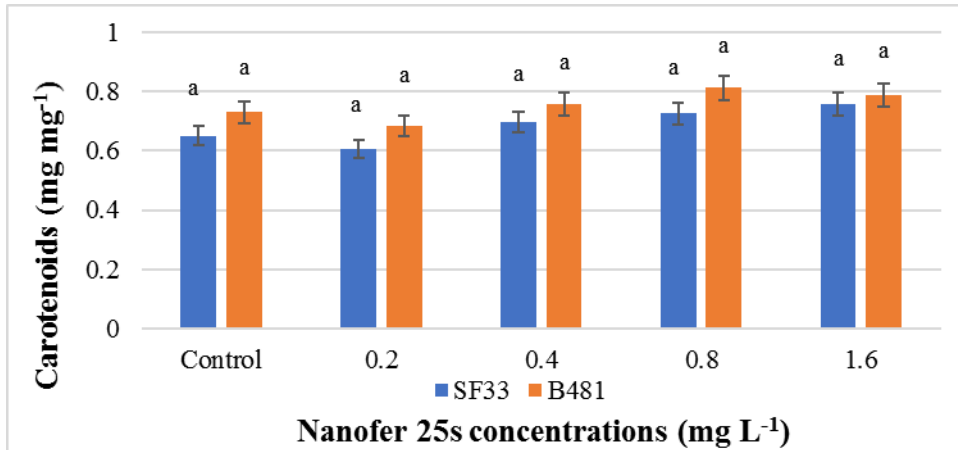

**Figure S3.** Impact of 0.2, 0.4, 0.8, and 1.6 mg L<sup>-1</sup> Nanofer 25s on (a) phycoyanin, (b) allophycoyanin, and (c) phycoerythrin accumulation in *Fremyella diplosiphon* strains, SF33 and B481.

a)

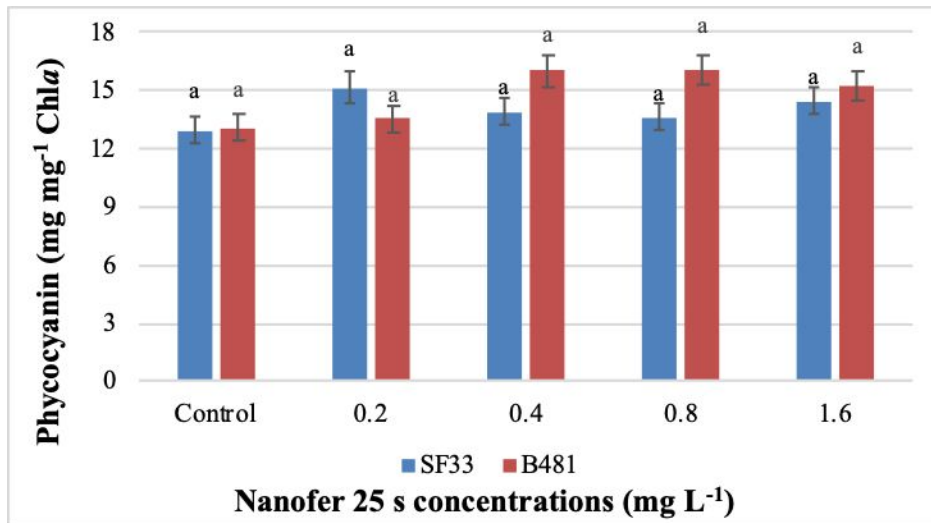

b)

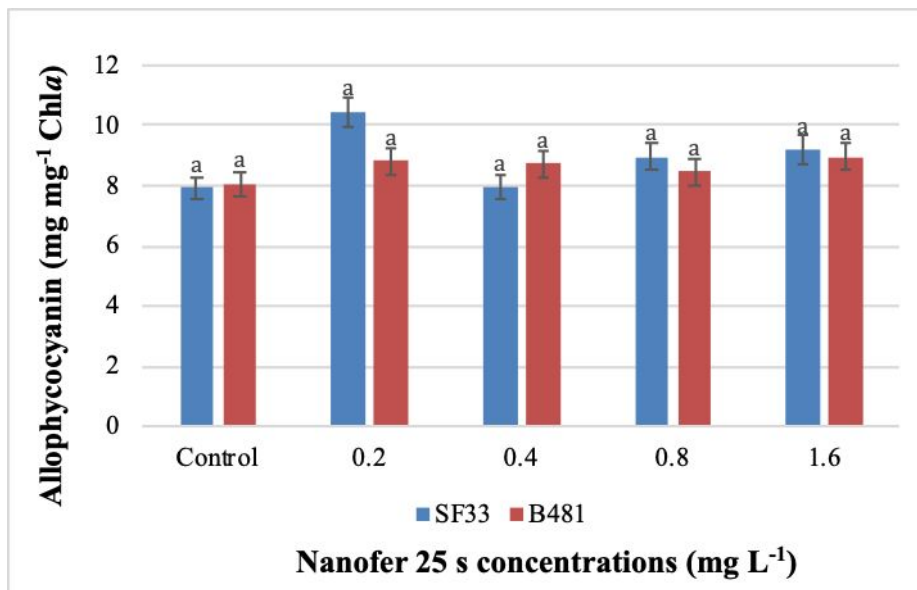

c)

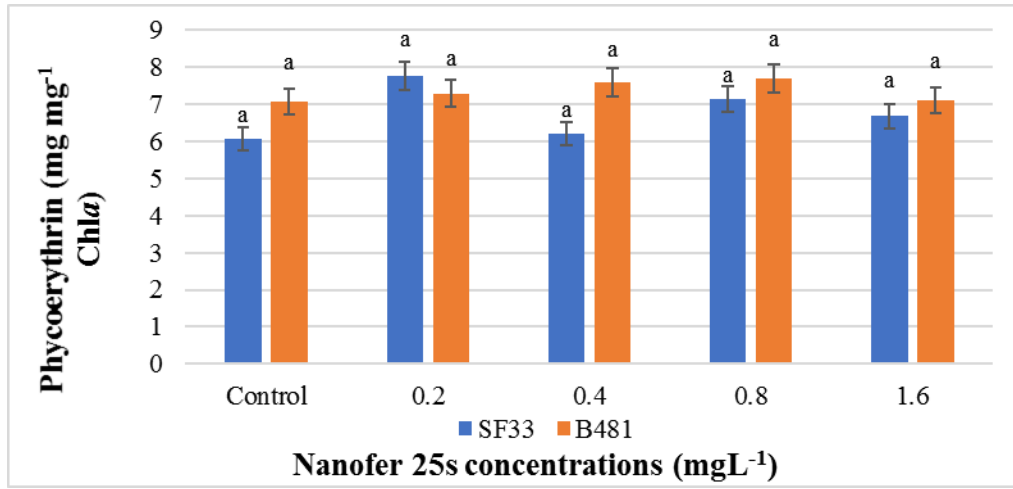

Supplement: ao0c00566_si_001.pdf [file ao0c00566_si_001.pdf]
